# Supplementary material for: Perceptions of Public University Students Towards Online Classes During COVID-19 Pandemic in Bangladesh
Source: Frontiers journal article supplement (doi:10.3389/feduc.2021.703723), 2021-07-16
Supplement: Data_Sheet_1.PDF [file Data_Sheet_1.PDF]

## *Supplementary Material*

### Sample of the 20 Survey questions

1. What is your age? Please write in number; such as: 22
  - .....
2. What is your gender?
  - Male
  - Female
3. What is your educational qualification?
  - Undergraduate
  - Graduate
  - Others
4. What is marital status?
  - Married
  - Unmarried
5. What is the name of your University?
  - .....
6. Which area you live in?
  - Rural
  - Urban
7. Which electronic devices you use to attend in online classes?
  - Mobile
  - Laptop/PC
8. Which type of network connection you use to join in online classes?
  - Mobile network
  - Broadband connection

| <b>Scale: 1=Strong Disagree, 2=Disagree, 3= Neutral, 4=Agree, 5= Strongly Agree</b>                                   | <b>1</b> | <b>2</b> | <b>3</b> | <b>4</b> | <b>5</b> |
|-----------------------------------------------------------------------------------------------------------------------|----------|----------|----------|----------|----------|
| I had no problems communicating with my teacher when I have questions or concerns during an online class.             |          |          |          |          |          |
| I never had any difficulties communicating with my classmates during online classes.                                  |          |          |          |          |          |
| I think I learn just as much as online class as I would sitting in normal class.                                      |          |          |          |          |          |
| I feel that I am challenged as much in an online class environment as I would normally be in a traditional classroom. |          |          |          |          |          |
| I will participate in all the online classes.                                                                         |          |          |          |          |          |
| The content of the lecture are clearly understood in the online classes.                                              |          |          |          |          |          |
| I have more flexibility in online classes than the traditional classes.                                               |          |          |          |          |          |

## Supplementary Material

|                                                                                        |  |  |  |  |  |
|----------------------------------------------------------------------------------------|--|--|--|--|--|
| Online assignments were helpful in understanding the course contents.                  |  |  |  |  |  |
| I am able to take class notes in online classes like as traditional classes.           |  |  |  |  |  |
| The opportunity of participating in online classes is really helpful in this pandemic. |  |  |  |  |  |
| I would recommend my friends to participate in online classes.                         |  |  |  |  |  |
| I do not face any trouble in accessing online classes.                                 |  |  |  |  |  |
